# Supplementary material for: Impacts of anthropogenic inputs on hypoxia and oxygen dynamics in the Pearl River estuary
Source: Copernicus journal article supplement (doi:10.5194/bg-15-6105-2018), 2018-10-18
Supplement: Supplementary file 1 [file bg-15-6105-2018-supplement.pdf]

Supplement of Biogeosciences, 15, 6105–6125, 2018  
<https://doi.org/10.5194/bg-15-6105-2018-supplement>  
© Author(s) 2018. This work is distributed under  
the Creative Commons Attribution 4.0 License.

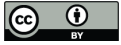

*Supplement of*

## **Impacts of anthropogenic inputs on hypoxia and oxygen dynamics in the Pearl River estuary**

**Bin Wang et al.**

*Correspondence to:* Jiatang Hu ([hujtang@mail.sysu.edu.cn](mailto:hujtang@mail.sysu.edu.cn)) and Shiyu Li ([eeslsy@mail.sysu.edu.cn](mailto:eeslsy@mail.sysu.edu.cn))

The copyright of individual parts of the supplement might differ from the CC BY 4.0 License.

## Annual discharge during 1999~2010

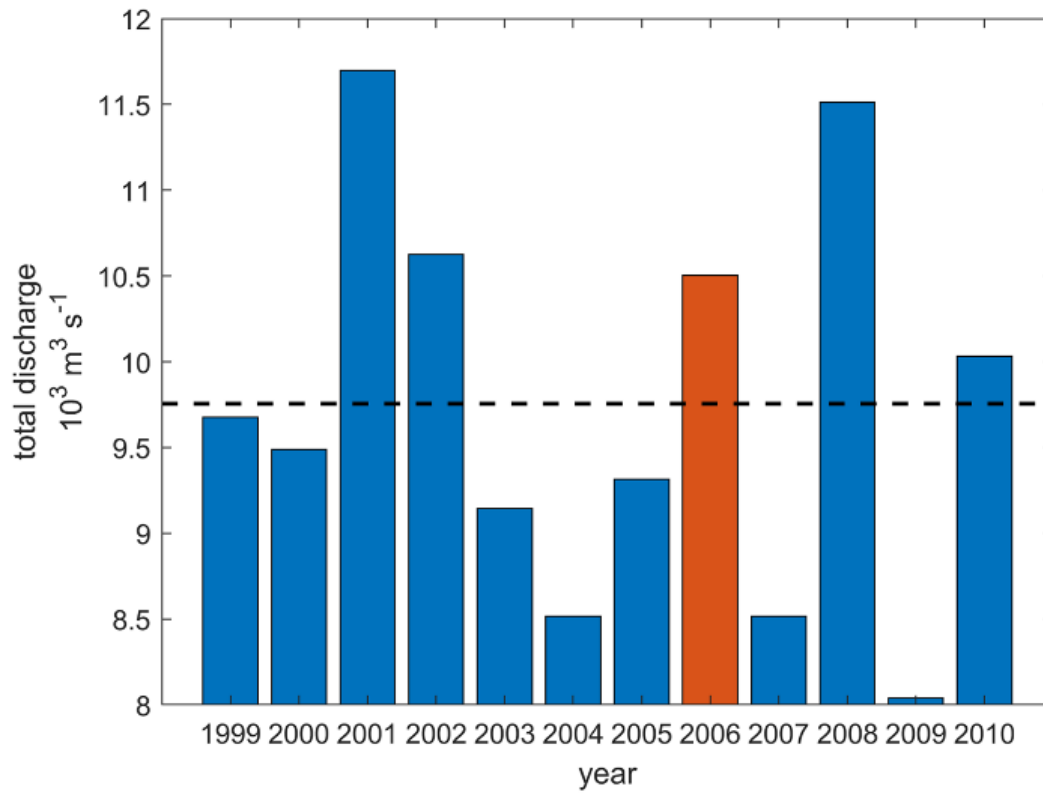

Figure s1. Interannual total river discharges of the Pearl River Network during 1999~ 2010
